# Supplementary material for: Storage globulins pass through the Golgi apparatus and multivesicular bodies in the absence of dense vesicle formation during early stages of cotyledon development in mung bean
Source: PubMed Central journal article supplement — J Exp Bot. 2011 Dec 5;63(3):1367–80. doi: 10.1093/jxb/err366 (PMC3276096; doi:10.1093/jxb/err366), 2011-12-05
Supplement: supp_err366_00068312_file001.pdf [file supp_err366_00068312_file001.pdf]

## **Supplementary Materials**

**Storage globulins pass through the Golgi apparatus and multivesicular bodies in the absence of dense vesicle formation during early stages of cotyledon development in mung bean**

Junqi Wang, Yu Chung Tse, Giselbert Hinz, David G. Robinson, and Liwen Jiang

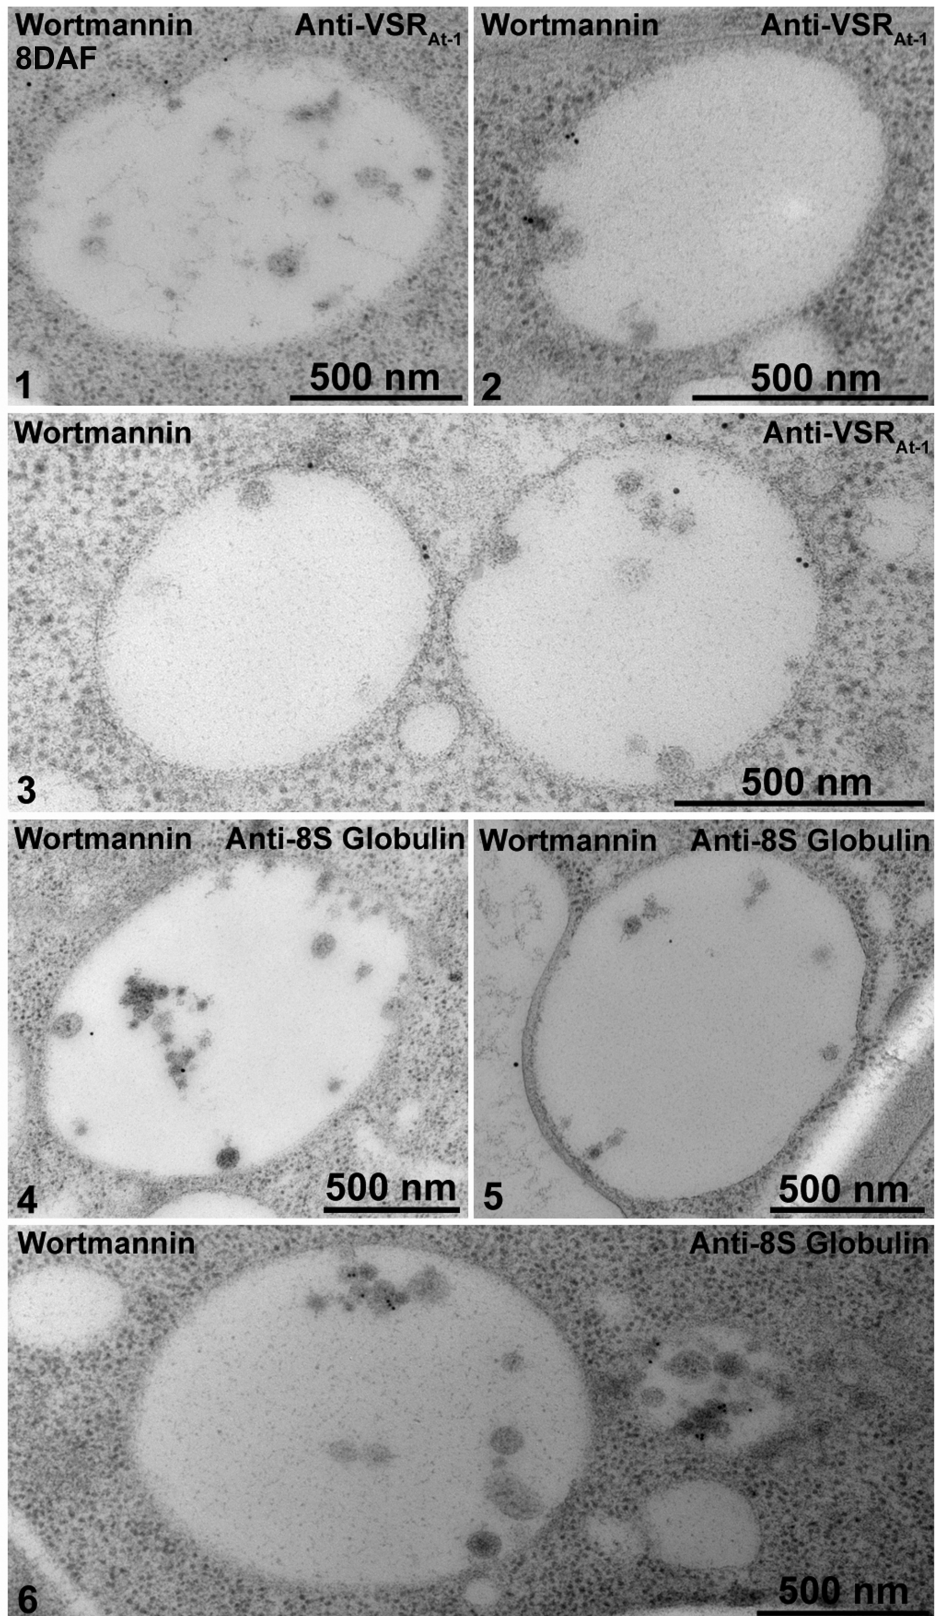

**Figure S1. Immunogold EM analysis of wortmannin treatment on MVBs/PVCs of 8 DAF developing mung bean cotyledons.**

Developing mung bean cotyledons at 8 DAF stage were collected and treated with wortmannin, followed by high-pressure frozen/freeze-substituted and embedded in HM20. Ultra-thin sections were then prepared, followed by immunogold EM analysis using either anti-8S globulin or anti-VSR antibodies as indicated. Scale bars = 500nm. VSR, vacuolar sorting receptor.

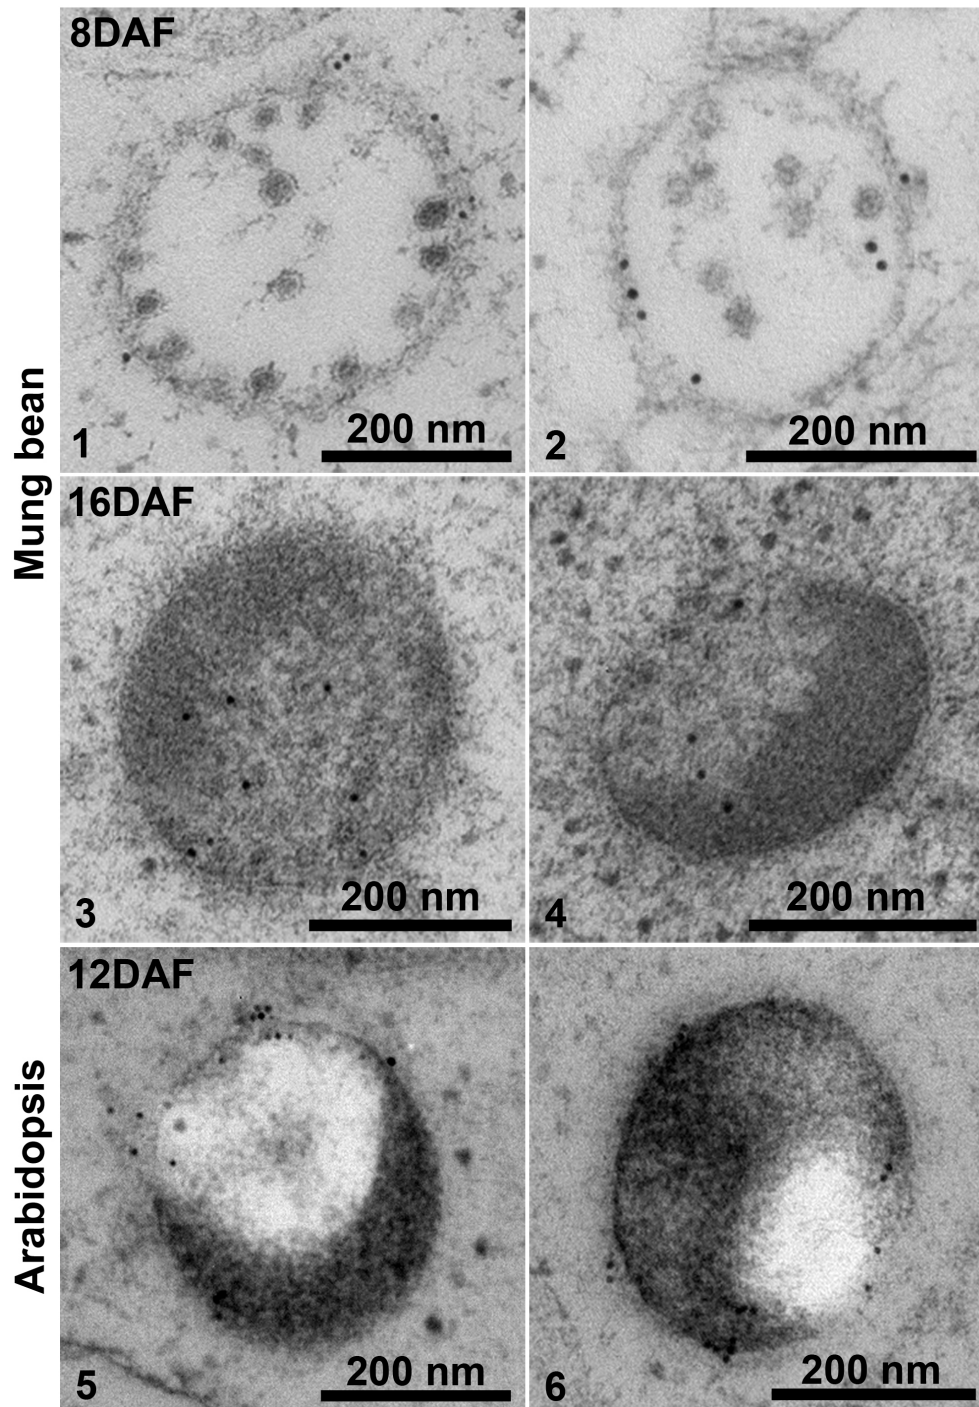

**Figure S2. Immunogold EM Analysis of MVB/PVCs in Developing Mung bean and Arabidopsis Seeds using anti-VSRat-1 antibody.**

Developing mung bean (at 8 DAF and 16 DAF) and Arabidopsis (at 12DAF) seeds were collected, high-pressure frozen/freeze-substituted and embedded in HM20. Ultra-thin sections were then prepared, followed by immunogold EM analysis using anti-VSRat-1 antibodies as indicated. Panels 1-2, show VSRat-1-positive MVBs in 8 DAF mung bean cotyledons. Panels 3-4, show distinct MVBs labeled with anti-VSRat-1 antibody in 16 DAF mung bean cotyledons. Panels 5-6, show PVCs labeled with anti-VSRat-1 antibody in 12 DAF Arabidopsis embryo. Scale bars = 200nm.
